# Supplementary material for: Intercalation pseudocapacitance in a NASICON-structured Na2CrTi(PO4)3@carbon nanocomposite: towards high-rate and long-lifespan sodium-ion-based energy storage
Source: Royal Society of Chemistry journal article supplement (doi:10.1039/c9ta05926a), 2019-01-01
Supplement: c9ta05926a1.pdf [file c9ta05926a1.pdf]

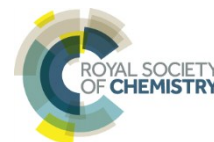

Journal Name

ARTICLE

Electronic Supporting Information

# Intercalation Pseudocapacitance in NASICON-Structured $\text{Na}_2\text{CrTi}(\text{PO}_4)_3$ @Carbon nanocomposite: Towards High-Rate and Long Lifespan Sodium-Ion-based Energy Storage

Dongxue Wang,<sup>‡a</sup> Zhixuan Wei,<sup>‡a</sup> Yunxiang Lin,<sup>b</sup> Nan Chen,<sup>a</sup> Yu Gao,<sup>\*a</sup> Gang Chen,<sup>a</sup> Li Song,<sup>b</sup> and Fei Du<sup>\*a</sup>

<sup>a</sup>Key Laboratory of Physics and Technology for Advanced Batteries (Ministry of Education), State Key Laboratory of Superhard Materials, College of Physics, Jilin University, Changchun, 130012, People's Republic of China

<sup>b</sup>National Synchrotron Radiation Laboratory, CAS Center for Excellence in Nanoscience, University of Science and Technology of China, Hefei 230029, Anhui, People's Republic of China

\*Corresponding authors.

E-mail addresses: [dufei@jlu.edu.cn](mailto:dufei@jlu.edu.cn), [yugao@jlu.edu.cn](mailto:yugao@jlu.edu.cn).

<sup>‡</sup>These authors contributed equally to this work.

## Supplementary Figures

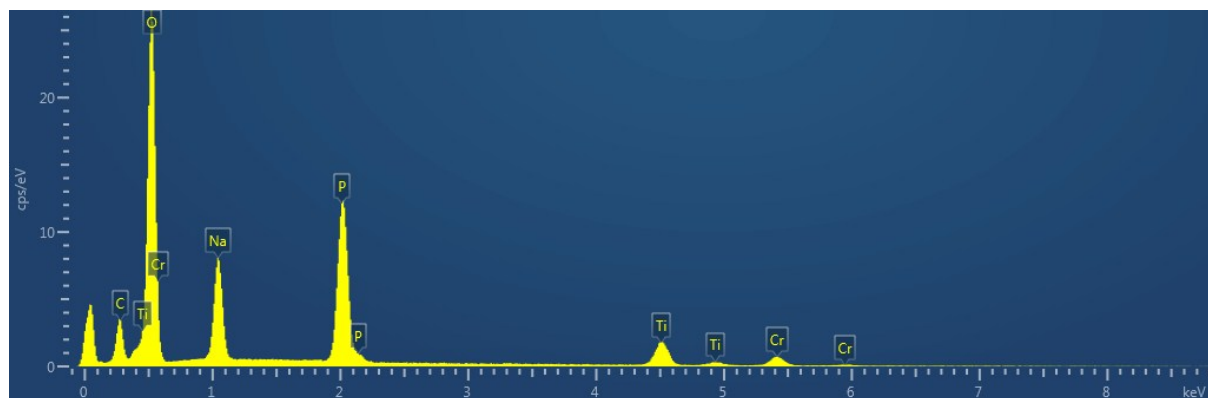

**Figure S1.** The EDX pattern of Na<sub>2</sub>CrTi(PO<sub>4</sub>)<sub>3</sub>@C nanoparticles

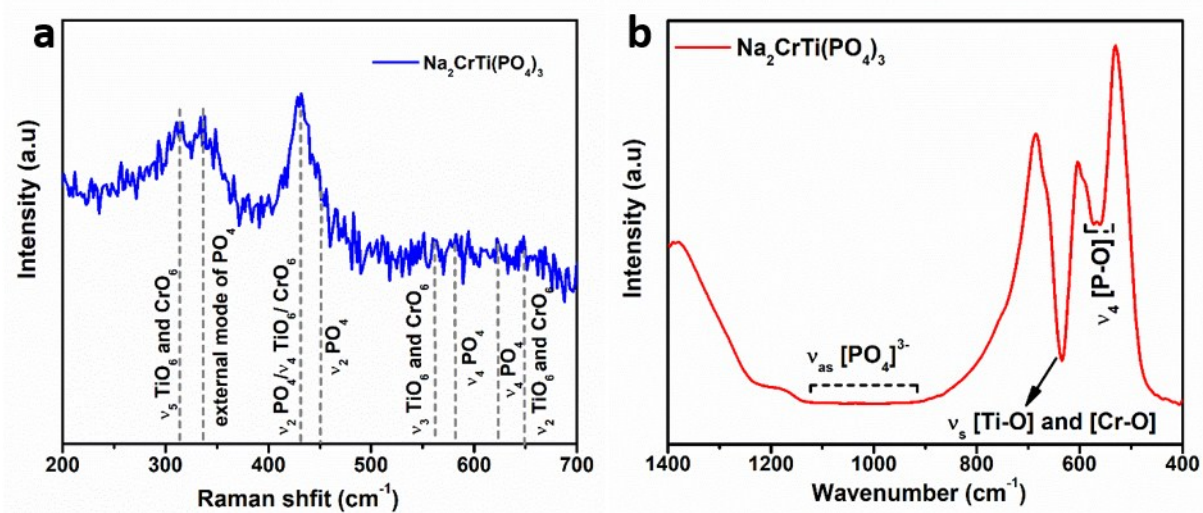

**Figure S2.** (a) Raman and (b) FT-IR spectrum of  $\text{Na}_2\text{CrTi}(\text{PO}_4)_3$ @C nanoparticles

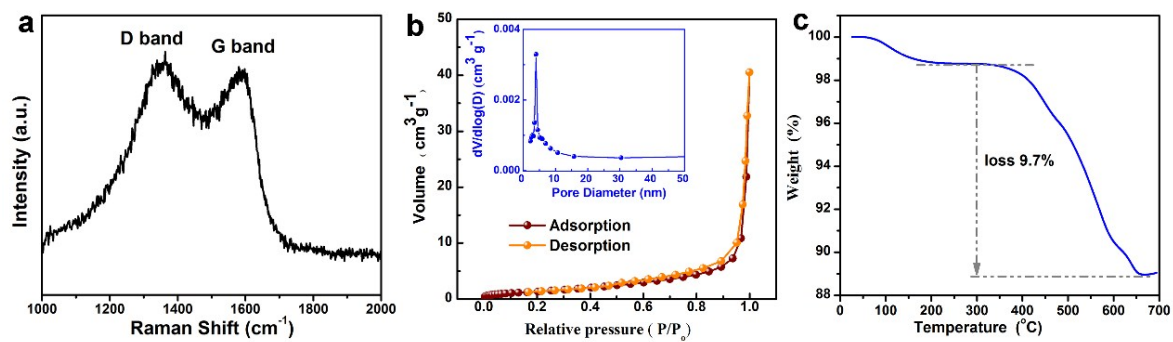

**Figure S3.** (a) Raman spectrum; (b) N<sub>2</sub> absorption–desorption isotherms with the pore-size distribution as the inset and (c) TG curve of Na<sub>2</sub>CrTi(PO<sub>4</sub>)<sub>3</sub>@C nanoparticles.

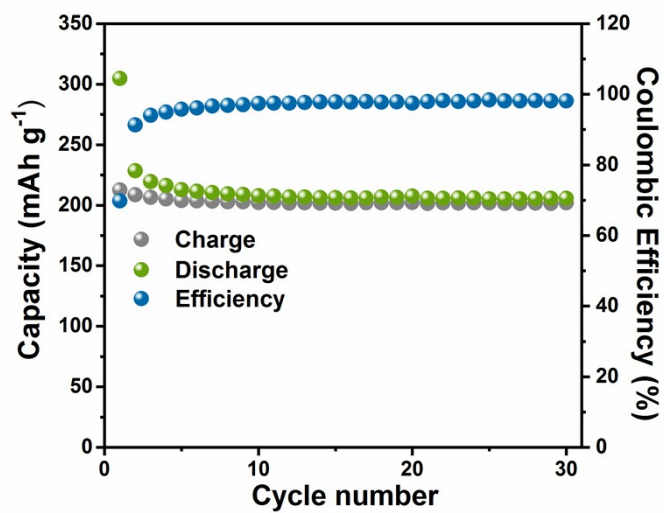

**Figure S4.** Cycle performance of  $\text{Na}_2\text{CrTi}(\text{PO}_4)_3@C$  anode over 30 times under the current density of 20  $\text{mA g}^{-1}$ .

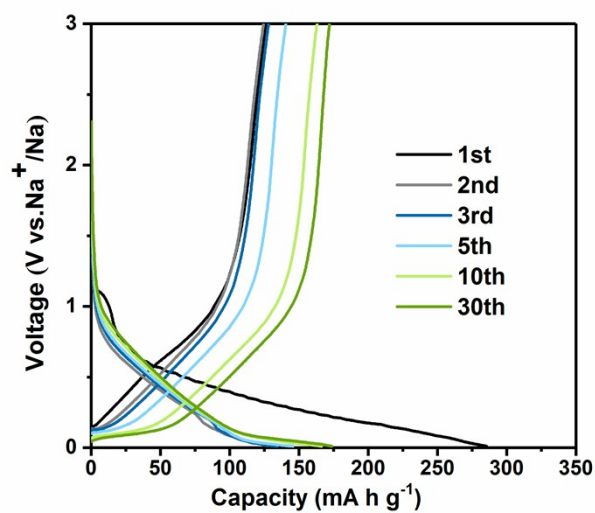

**Figure S5.** The 1st, 2nd, 3rd, 5th, 10th and 30th galvanostatic charge–discharge profiles of carbon at a current density of 20 mA g<sup>-1</sup>.

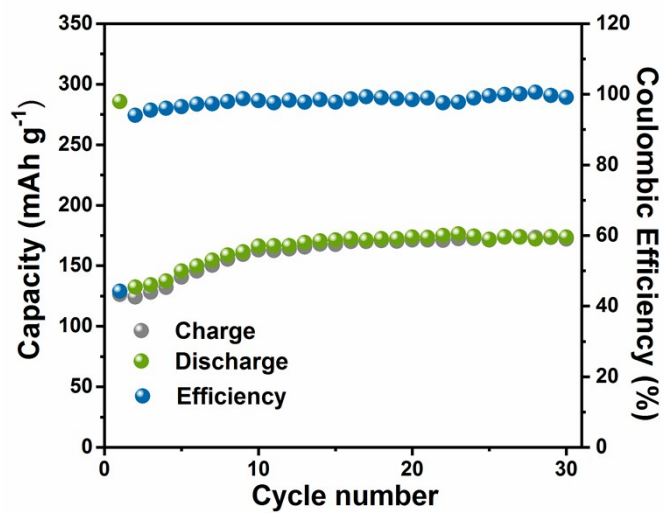

**Figure S6.** Cycle performance of carbon anode over 30 times under the current density of 20 mA g<sup>-1</sup>.

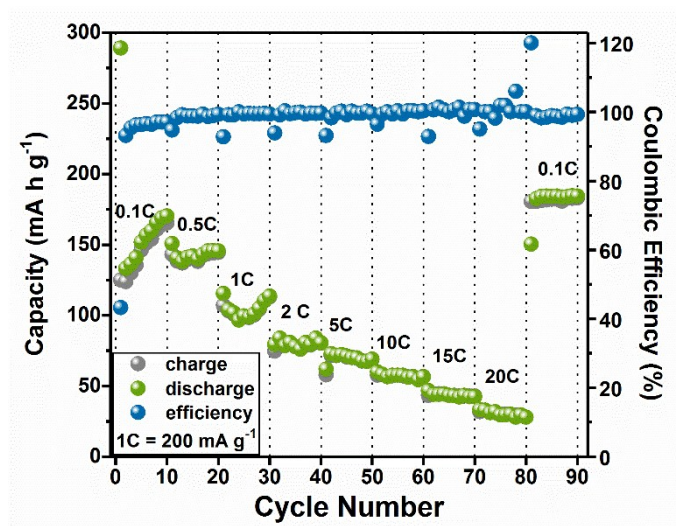

Figure S7. Rate performance of carbon.



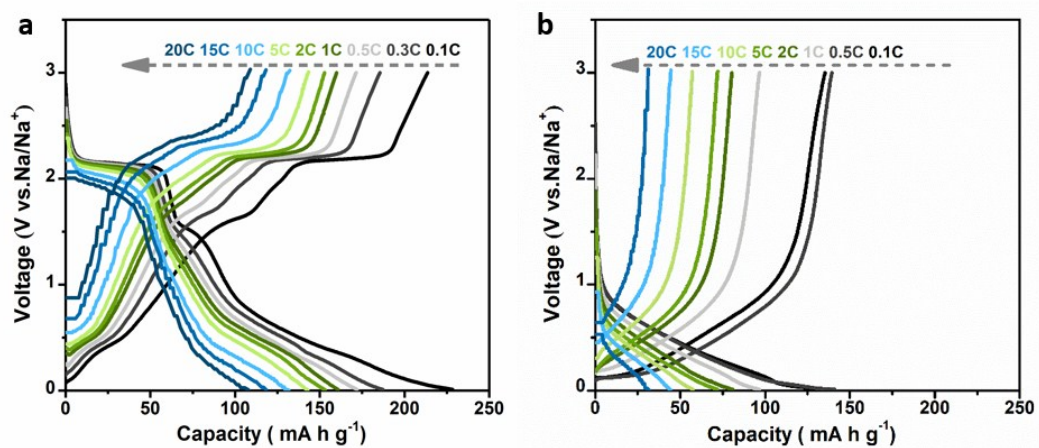

**Figure S8.** The galvanostatic charge-discharge curves of Na<sub>2</sub>CrTi(PO<sub>4</sub>)<sub>3</sub>@C (a) and carbon (b) at different current densities

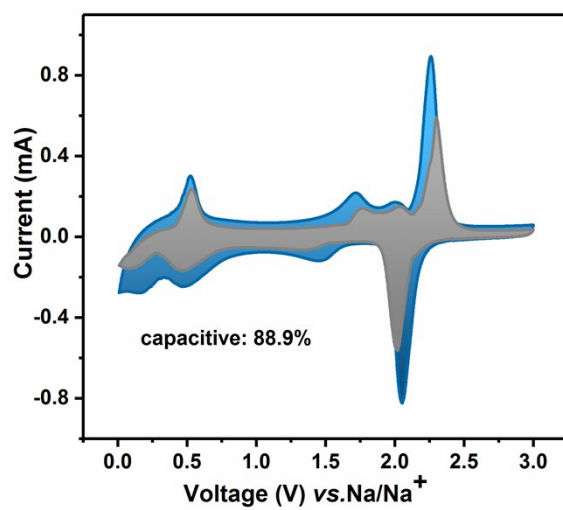

**Figure S9.** Separation of capacitive (shaded region) and diffusion-controlled contribution at  $1 \text{ mV s}^{-1}$ .

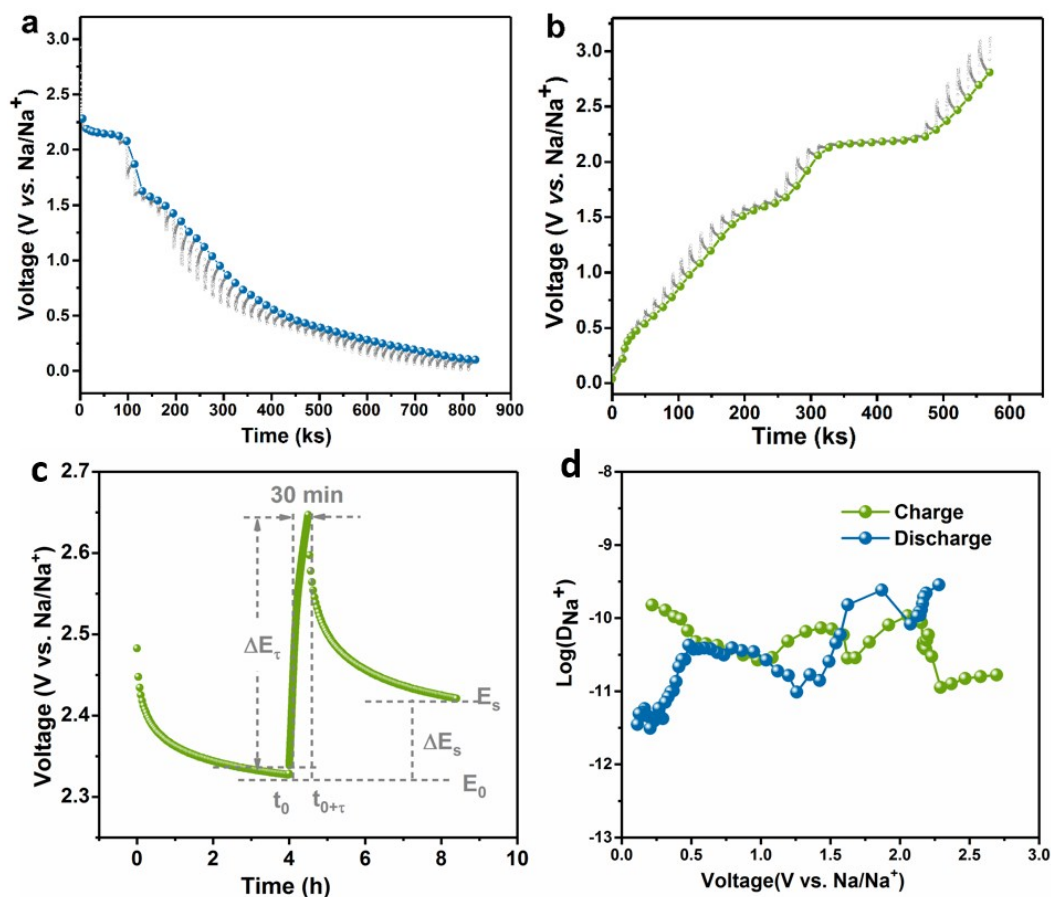

**Figure S10.** GITT profiles of  $\text{Na}_2\text{CrTi}(\text{PO}_4)_3@\text{C}$  during the 2nd discharge (a) and charge (b) progress; (c) Current step diagram of  $\text{Na}_2\text{CrTi}(\text{PO}_4)_3@\text{C}$  at 2.42 V vs.  $\text{Na}/\text{Na}^+$  in the 2nd desodiation process (d) Diffusion coefficient calculated from GITT potential profiles.

The galvanostatic intermittent titration technique (GITT) was carried out in a coin cell after the initial cycle to evaluate the apparent diffusion coefficient ( $D_{\text{Na}^+}$ ) for  $\text{Na}_2\text{CrTi}(\text{PO}_4)_3@\text{C}$  nanoparticles. The quasi-equilibrium potentials for both initial sodiation (Figure S10a) and desodiation (Figure S10b) progresses are consistent well with the discharge-charge curves of  $\text{Na}_2\text{CrTi}(\text{PO}_4)_3@\text{C}$  nanocomposites with little overpotential less than 0.38 V in both sodiation and desodiation progress, which indicated large ion diffusion coefficient of the (de)sodiation processes. The quantitative diffusion coefficient in  $\text{Na}_2\text{CrTi}(\text{PO}_4)_3@\text{C}$  anode as a function of voltage is displayed in Figure S10d with detailed calculation method shown in Figure S10c. The GITT-determined diffusion coefficient is calculated as ranging from ca.  $10^{-9}$  to  $10^{-11}$   $\text{cm}^2 \text{ s}^{-1}$  during the 2nd discharge progress and the following charge progress, which is comparable to other NASICON-type compounds but higher than those compounds with layer structure. The higher  $D_{\text{Na}^+}$  of  $\text{Na}_2\text{CrTi}(\text{PO}_4)_3@\text{C}$  can be ascribed to the 3D framework of  $\text{Na}_2\text{CrTi}(\text{PO}_4)_3@\text{C}$  and the nano particle size as well as the high electronic conductivity contributed by the carbon complex.

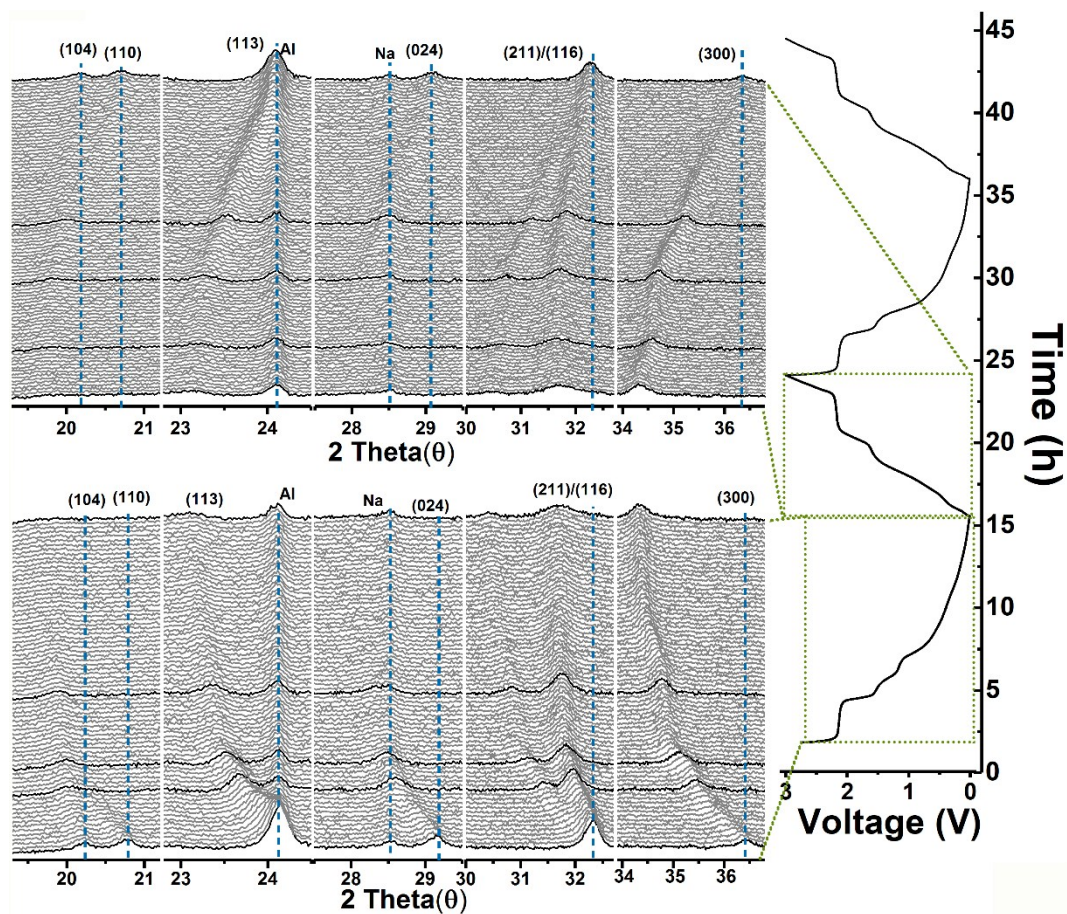

**Figure S11.** The enlarged in situ XRD patterns for the whole 1st discharge-charge progress with the corresponding discharge profiles on the right hand.

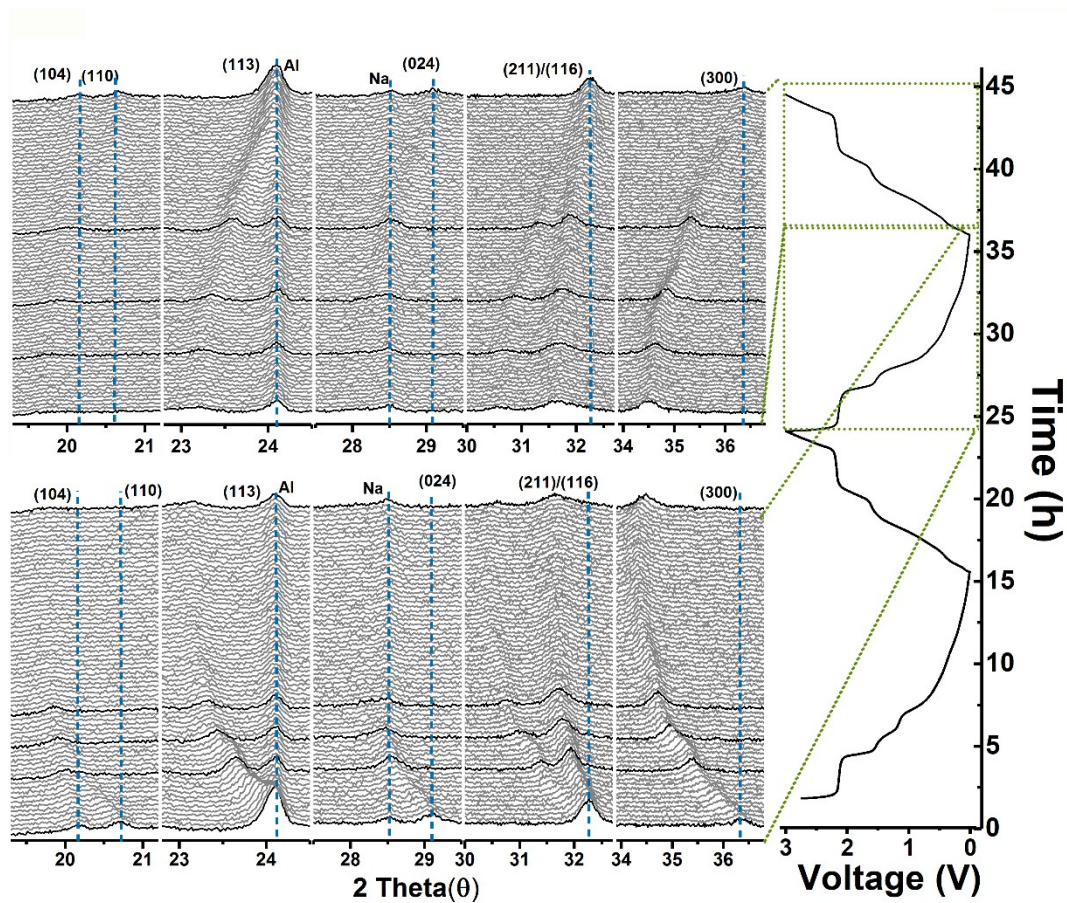

**Figure S12.** The enlarged in situ XRD patterns for the whole 2nd discharge-charge progress with the corresponding discharge profiles on the right hand.

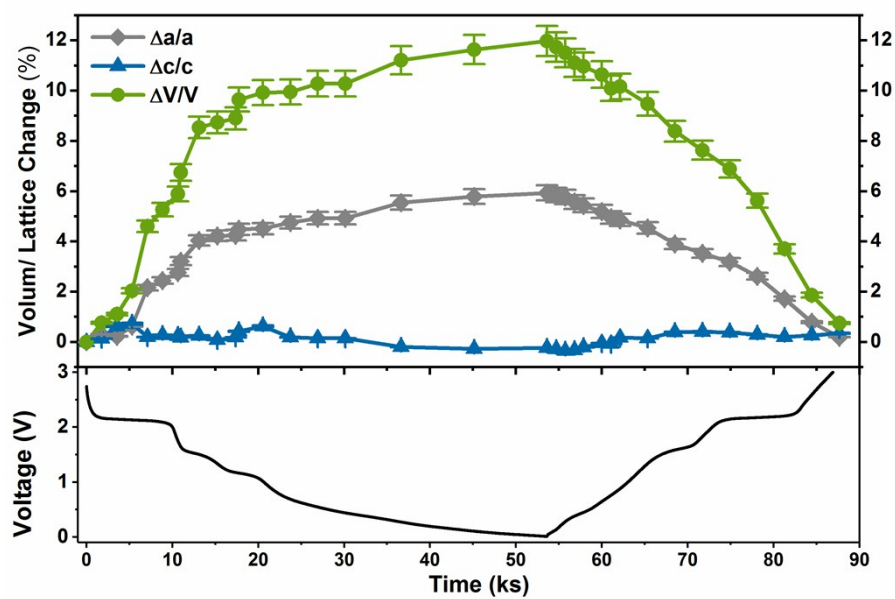

**Figure S13.** The evolution of lattice parameters during the initial cycle process.

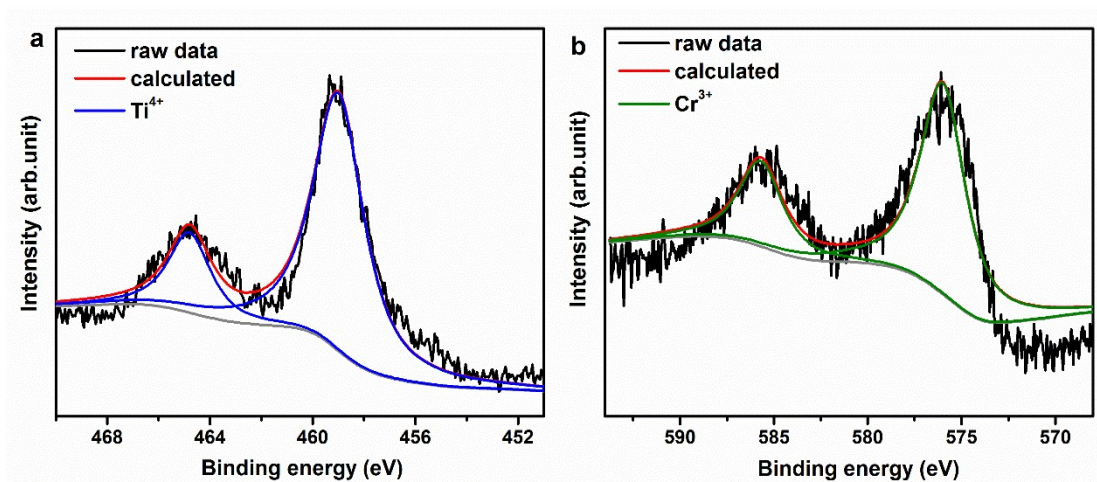

**Figure S14.** XPS spectrum of (a) Ti 2p and (b) Cr 2p in the Na<sub>2</sub>CrTi(PO<sub>4</sub>)<sub>3</sub>@C electrode.

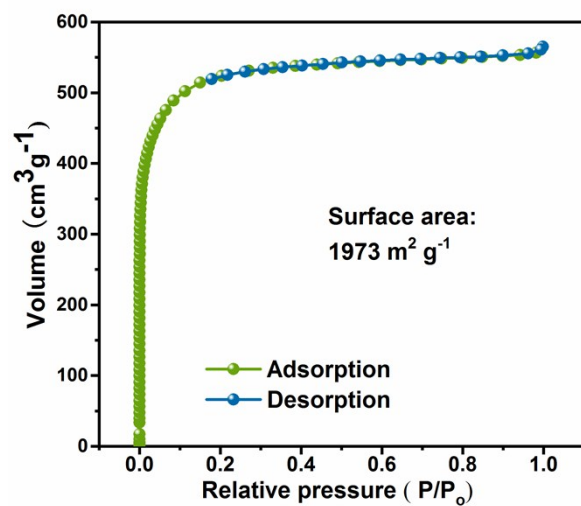

**Figure S15.** N<sub>2</sub> adsorption–desorption isotherms of AC.



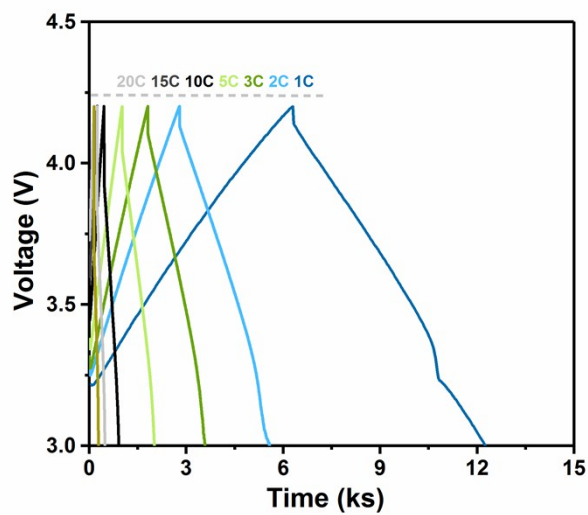

**Figure S16.** Profile of charge-discharge curves of [AC|| Na] capacitors at different current densities.

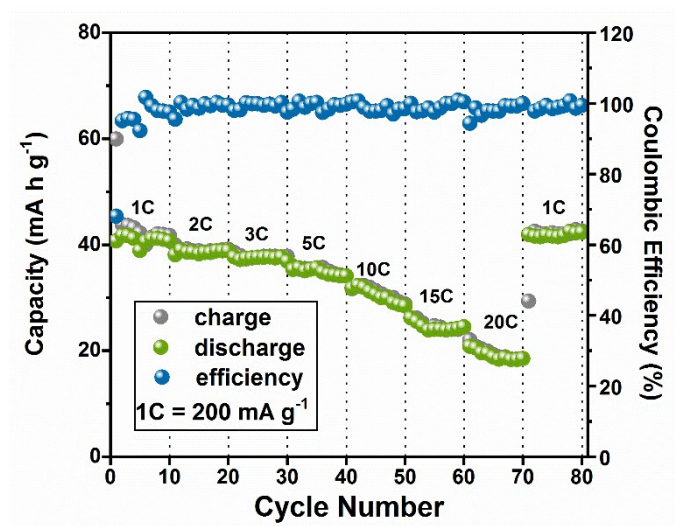

Figure S17. Rate performance of AC at different current densities.

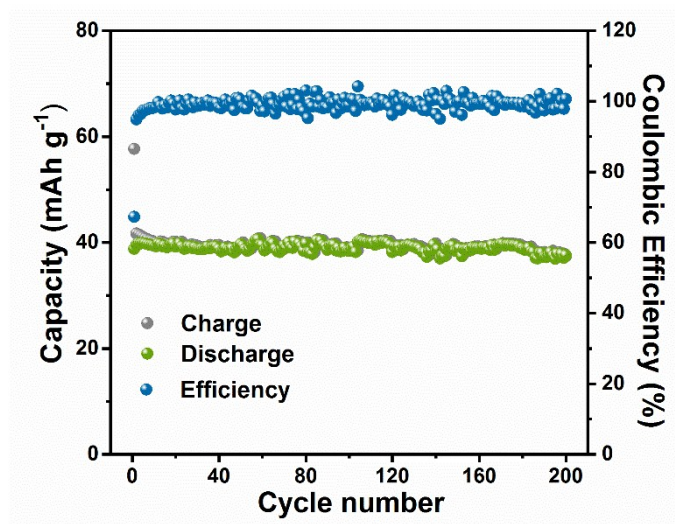

**Figure S18.** Cycle performance of AC over 200 times under the current density of 200 mA g<sup>-1</sup>.

Supplementary Table 1. The atomic positions of Na<sub>2</sub>CrTi(PO<sub>4</sub>)<sub>3</sub>@C nanocomposite upon Rietveld refinement results.

|     | Wyckoff position | x         | y         | z         | Biso      | Occ      |
|-----|------------------|-----------|-----------|-----------|-----------|----------|
| Na1 | <i>6b</i>        | 0         | 0         | 0         | 4.7477(8) | 1.028(6) |
| Na2 | <i>18e</i>       | 0.6350(5) | 0         | 0.25      | 4.7477(8) | 0.317(3) |
| Cr  | <i>12c</i>       | 0         | 0         | 0.1462(9) | 0.0397(3) | 0.5      |
| Ti  | <i>12c</i>       | 0         | 0         | 0.1462(9) | 0.0397(3) | 0.5      |
| P   | <i>18e</i>       | 0.2894(2) | 0         | 0.25      | 0.7051(0) | 1        |
| O1  | <i>36f</i>       | 0.1919(5) | 0.1667(1) | 0.0883(7) | 0.4153(8) | 1        |
| O2  | <i>36f</i>       | 0.0273(5) | 0.2036(5) | 0.1929(7) | 0.4153(8) | 1        |

Space Group: *R-3c*, *a*=8.5440(8), *c*=21.7986(7), *R*<sub>wp</sub>=11.6, *R*<sub>p</sub>=8.93
